# Supplementary material
Source: publisher figshare collection journal article supplement (https://sage.figshare.com/ndownloader/files/13569146)
Supplement: Supplementary file 1 [file 13569146]

Many thanks for your help, Prue Barry (Trainee SCP).

|  |
|--|
|  |
|--|

☐ Yes

☐ Limited

☐ No

☐ Yes

☐ No

☐ Don't know

Strongly agree      Agree      Neither agree nor disagree      Disagree

 Strongly disagree

[illegible]

5. In your opinion how can the SCP role enhance learning for inexperienced theatre staff? Please select as many answers as you wish.

- ☐ ♣ Development of an information folder
- ☐ ♣ Teaching sessions
- ☐ ♣ Direction to online robotic training modules
- ☐ ♣ End of rotation quiz to test knowledge
- ☐ ♣ Further informal teaching intraoperatively
- ☐ ♣ Simulation training Eg Emergency undocking
- ☐ Liaison with clinical educators to update robotic competencies ♣
- ☐ ♣ The SCP role does not enhance learning for inexperienced theatre staff
- ☐ Other (please specify)

[illegible]

6. I feel that the teaching during my robotic rotation has met my learning needs.

☐ Strongly agree ☐ Agree ☐ Neither agree nor disagree ☐ Disagree ☐ Strongly disagree

COMMENTS:

[illegible]

7. I feel confident that I could manage an emergency undocking of the robot.

☐ Strongly agree    ☐ Agree    ☐ Neither agree nor disagree    ☐ Disagree    ☐ Strongly disagree

COMMENTS:

[illegible]

8. I feel confident that I am able to deal with a robot malfunction.

Strongly agree      Agree      Neither agree nor disagree      Disagree      Strongly disagree

Strongly agree

Agree

Neither agree nor disagree

Disagree

Strongly disagree

☐ Strongly agree

☐ Agree

☐ Neither agree nor disagree

☐ Disagree

☐ Strongly disagree

COMMENTS:

9. I feel more confident when the SCP is the patient side assistant.

Strongly agree

Agree

Neither agree nor disagree

Disagree

Strongly disagree

☐ Strongly agree

☐ Agree

☐ Neither agree nor disagree

☐ Disagree

☒ Strongly disagree

COMMENTS:

10. Are you:

- ☐ Male
- ☐ Female
- ☐ Prefer not to say

DONE - THANK YOU FOR YOUR TIME
